# Supplementary material for: Two-photon induced blue fluorescent emission of heterocycle-based organic moleculeElectronic supplementary information (ESI) available: preparation of ASBM. See http://www.rsc.org/suppdata/cc/b2/b206715c/
Source: Royal Society of Chemistry journal article supplement (doi:10.1039/b206715c), 2002-09-20
Supplement: b206715c.doc [file b206715c.doc]

**Electronic Supplementary Information:**

***† Preparation of trans-2-[p-formylstyryl]benzimidazole (abbr. as ASBM):***

A mixture of 2-methylbenzimidazole (1.33g, 0.01 mol), p-phthaldialdehyde (1.34g, 0.01 mol), acetic anhydride (3ml) and acetic acid (1.5ml) was stirred at 120ºC for 6 h, then cooled to room temperature. After adding concentrated hydrochloric acid (15ml), the mixture was left for an hour, filtered and washed with water. The filtrate was treated with 30% aqueous sodium hydroxide solution (30ml) and gave yellowish precipitate; filtered; and dried. The crude product was purified through column chromatography on silica gel using petroleum ether-ethyl acetate (10:1) as eluent. Bright yellowish green crystals with yield 76% and mp 178-180ºC were thus obtained. 1H NMR (300MHz, CDCl3, TMS, ppm): 7.293 (d, J=6.99 Hz, 2H, CH=CH), 7.312 (d, J=3.28 Hz, 1H), 7.333 (d, J=3.20 Hz, 1H), 7.655 (d, J=5.9 Hz, 1H), 7.694 (d, J=10.94 Hz, 1H), 7.619 (d, J=8.21 Hz, 2H), 7.869 (d, J=8.27 Hz, 2H), 7.657 (s, NH), 10.015 (s, CHO)
